# Supplementary material for: A computational analysis of mouse behavior in the sucrose preference test
Source: PubMed Central journal article supplement (PMC10140068; doi:10.1038/s41467-023-38028-0), 2023-04-27
Supplement: 41467_2023_38028_MOESM3_ESM.pdf [file 41467_2023_38028_MOESM3_ESM.pdf]

## **Description of Additional Supplementary Files**

File Name: Supplementary Movie 1

Description: The video shows simultaneous behavioral and computational analysis of a sample mouse in the sucrose preference test.
